# Supplementary material for: An AC electrothermal self-circulating system with a minimalist process to construct a biomimetic liver lobule model for drug testing
Source: Royal Society of Chemistry journal article supplement (doi:10.1039/c8ra03724h), 2018-01-01
Supplement: c8ra03724h1.pdf [file c8ra03724h1.pdf]

## Supplementary information for

# An AC electrothermal self-circulating system with a minimalist process to construct a biomimetic liver-lobule model for drug testing

Shengli Mi,<sup>a,e+</sup> Baihan Li,<sup>a+</sup> Xiaoman Yi,<sup>a</sup> Yuanyuan Xu,<sup>d</sup> Zhichang Du,<sup>a</sup> Shuaitao Yang,<sup>a</sup> Wei Li<sup>f</sup>, and Wei Sun<sup>a,b,c,d\*</sup>

<sup>a</sup> Graduate School at Shenzhen, Tsinghua University, Shenzhen, P. R. China. E-mail: weisun@mail.tsinghua.edu.cn; Tel: +8675526036329; Fax: 8675526036356.

<sup>b</sup> Department of Mechanical Engineering and Mechanics, Tsinghua University, Beijing, China.

<sup>c</sup> Department of Mechanical Engineering, Drexel University, Philadelphia, PA, USA.

<sup>d</sup> Tsinghua-Berkeley Shenzhen Institute, Shenzhen, P. R. China.

<sup>e</sup> Open FIESTA Center, Tsinghua University, Shenzhen 518055, PR China

<sup>f</sup> Department of Mechanical Engineering, The University of Texas at Austin, Austin, Texas 78712, USA .

<sup>g</sup> +.These authors contributed equally to this work.

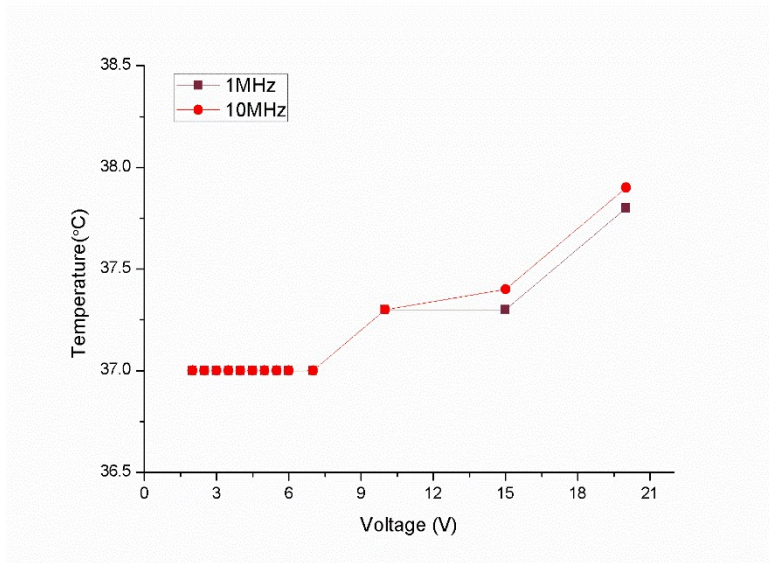

**Supplementary Figure S1.** Measured temperature results of the liver lobule model channel at  $\sigma=1.45$  S/m,  $f=10$  MHz and 1MHz with voltage varying from 2.5-20V.
